# Supplementary material for: A scoping review of determinants of performance in dressage
Source: PeerJ. 2020 Apr 24;8:e9022. doi: 10.7717/peerj.9022 (PMC7185025; doi:10.7717/peerj.9022)
Supplement: Table S3 [file peerj-08-9022-s003.xlsx]

## Sheet: Sheet 1
Search Number	Query
1	Horse n1 riding
2	elite dressage
3	paradressage or para-dressage or para dressage
4	dressage performance
5	horseback riding
6	horse n1 rider
7	horseback rider
8	able bodied rider*
9	experienced rider*
10	advanced rider*
11	disabled rider*
12	equestrian
13	"horse rider"
14	equestrian athlete
15	classical equitation
16	equitation science
17	equine
18	horse
19	equine athlete
20	equine gaits
21	walk
22	trot
23	canter
24	gallop
25	heritability
26	cadence
27	tempo
28	physiology
29	heart rate
30	oxygen consumption
31	fitness
32	exercise physiology
33	psychology of riders
34	horse rider confidence
35	rider mental toughness
36	horse rider focus
37	therapeutic riding
38	therapeutic horse riding
39	therapeutic horseback riding
40	hippotherapy
41	"equine-assisted therapy"
42	"equine-assisted movement therapy"
43	equine therapy
44	equine movement therapy
45	"developmental riding therapy"
46	"riding for the disabled"
47	horses and therapy
48	"equine facilitated therapy"
49	coordination
50	skills
51	equitation
52	horse and rider dyad
53	harmony
54	horse and rider and interaction
55	horse and rider relationship
56	postural stability
57	judges score
58	judge
59	breeding
60	breed evaluation
61	temperament of horses
62	competition score
63	dressage score
64	trainability
65	rideability
66	training
67	rollkur
68	head and neck position
69	equitation science
70	ethical equitation
71	hyperflexion
72	"on the bit"
73	biomechanics
74	kinematic
75	electromyography or EMG
76	Muscle activity
77	Kinetic
78	Postur*
79	COP OR centre of pressure OR center of pressure
80	Pressure OR pressure mat
81	Strain gauge
82	Ground reaction force OR GRF
83	Timing
84	Riding simulator
85	Velocity
86	displacement
87	Inertial measurement unit OR IMU
88	Range of Motion OR ROM
89	Saddle
90	Acceleration
91	impulse
92	locomotion
93	balance
94	equine balance
95	equine locomotion
96	Self-carriage or self carriage
97	propulsion
98	outline
99	topline
100	rein tension
101	S1 OR S2 OR S3 OR S4 OR S5	English language and date filter applied from here
102	S6 OR S7 OR S8 OR S9 OR S10 OR S11 OR S12 OR S13 OR S14 OR S15 OR S16
103	S17 OR S18 OR S19 OR S20 OR S21 OR S22 OR S23 OR S24 OR S25 OR S26 OR S27
104	S28 OR S29 OR S30 OR S31 OR S32
105	S33 OR S34 OR S35 OR S36
106	S37 OR S38 OR S39 OR S40 OR S41 OR S42 OR S43 OR S44 OR S45 OR S46 OR S47 OR S48
107	S49 OR S50 OR S51 OR S52 OR S53 OR S54 OR S55 OR S56
108	S57 OR S58 OR S59 OR S60 OR S61 OR S62 OR S63 OR S64 OR S65
109	S66 OR S67 S68 OR S69 OR S70 OR S71 OR S72
110	S73 OR S74 OR S75 OR S76 OR S77 OR S78 OR S79 OR S80 OR S81 OR S82 OR S83 OR S84 OR S85 OR S86 OR S87 OR S88 OR S89 OR S90 OR S91 OR S92 OR S93 OR S94 OR S95 OR S96 OR S97 OR S98 OR S99 OR S100
111	S101 AND S105
112	S102 AND S105 AND S101
113	S102 AND S104 AND S107 AND S101
116	S105 AND S107 AND S101
117	S105 AND S110 AND S101
118	S101 AND S106
119	S102 AND S106 AND S101
120	S106 AND S107 AND S101
121	S106 AND S110 AND S101
122	S101 AND S107
123	S107 AND S108 AND S101
124	S102 AND S132 AND S101
125	S101 AND S108
126	S101 AND S108 AND S109
127	S101 AND S109
128	S108 AND S109 AND S110 AND S101
129	S101 AND S110
130	S101 AND S107 AND S110
131	S101 AND S102 AND S103
132	S101 AND S104 AND S110
133	S101 AND S104 AND S107
134	S101 AND S103 AND S106
136	S101 AND S103 AND S108
137	S101 AND S102 AND S107
138	S101 AND S103 AND S107
139	S101 AND S102 AND S109
140	S101 AND S109 AND S110
141	S101 AND S103 AND S109 AND S110
142	S101 AND S102 AND S110
143	S101 AND S103 AND S110
144	S101 and S102 and S107 and S108
145	S101 and S108 and S109 and S110
