# Supplementary material for: A scoping review of determinants of performance in dressage
Source: PeerJ. 2020 Apr 24;8:e9022. doi: 10.7717/peerj.9022 (PMC7185025; doi:10.7717/peerj.9022)
Supplement: Table S4 [file peerj-08-9022-s004.xlsx]

## Sheet: Sheet1
	Argue and Clayton (1993) TC	Argue and Clayton (1993) WT)	Back et al. (1994)	Biau and Barrey (2004) scores	Biau et al. (2002)	Clayton 1997	Deuel and Park (1990) Canter Lead Change	Deuel and Park (1990)	Holmstrom et al. (1997)	Holmstrom et al. (1994)	Holmstrom et al. (1995)	Lashley et al. (2014)	Morales et al. (1998)	Tans et al. (2009)	Von Borstel et al (2014)
Purpose clearly stated	1	1	1	1	1	1	1	1	1	1	1	1	1	1	1
relevant background literature reviewed	0	0	1	1	1	1	1	1	1	1	1	1	1	1	1
design appropriate for study question	1	1	1	1	1	1	1	1	1	1	1	1	1	1	1
absence of any bias (sampling, intervention or measurement) influencing results	1	1	1	0	0	1	1	1	1	1	1	1	1	1	1
sample described in detail	1	0	1	0	0	1	0	0	1	1	0	1	0	0	1		Note: a point was awarded for "sample described in detail if the authors described the horse's breed, sex and height and/or age.
sample size justified	0	0	0	0	0	0	0	0	0	0	0	0	0	0	0
infomed consent obtained	0	0	0	0	0	0	0	0	0	0	0	0	0	1	1
outcome measures reliable	0	0	0	0	0	1	0	0	0	0	0	1	1	0	1		Note: reliability and validity points were awarded if the authors described things like calibrating the system, standard error of a measurement etc. It seemed the most appropriate for these types of studies or none would get a point!
outcome measures valid	0	0	0	0	0	1	0	0	0	0	0	1	1	0	1
intervention described in detail	NA	NA	NA	NA	NA	NA	NA	NA	NA	NA	NA	NA	NA	NA	NA		Could possibly consider removing this criteria, as none were intervention studies
results reported with statistical significance	1	1	1	1	1	1	1	1	0	1	1	1	1	1	1
analysis methods appropriate	1	1	1	1	1	1	1	1	0	0	1	1	1	1	1
significant differences between groups clinically meaningful	1	1	1	NA	1	NA	NA	NA	1	1	NA	1	1	1	NA
conclusions appropriate from results	1	1	1	1	1	1	1	1	1	1	1	1	1	1	1
implications of results influcencing clinical practice reported	0	0	1	0	0	1	1	1	1	1	1	1	0	0	1		Note: A point was awarded here when the author described how findings might be applied in equestrian practice.
main limitations or biases of the study discussed	0	0	0	0	0	1	0	0	0	1	1	0	1	1	1
	8	7	10	6	7	12	8	8	8	10	9	12	11	10	13
	15	15	15	14	15	14	14	14	15	15	14	15	15	15	14
	53.3333	46.6667	66.6667	42.8571	46.6667	85.7143	57.1429	57.1429	53.3333	66.6667	64.2857	80	73.3333	66.6667	92.8571
