# Supplementary material for: A scoping review of determinants of performance in dressage
Source: PeerJ. 2020 Apr 24;8:e9022. doi: 10.7717/peerj.9022 (PMC7185025; doi:10.7717/peerj.9022)
Supplement: Table S6 [file peerj-08-9022-s006.xlsx]

## Sheet: Sheet1
Author	Date	Title	Journal	Volume, Page	Participants	Setting	Study Design	Gaits/ Movements	Methods	Outcome Measures	Key Results	Quality Score
Argue and Clayton	1993	A preliminary study of transitions between walk and trot in dressage horses	Cells Tissues Organs	146, 179-182	16 Dressage horses at various levels of training from CEF Basic 1 to FEI GP.	Experimental arena set up	Cross-sectional	Transitions: Walk-trot (WT) and trot-walk (TW)	Horses videoed (30-Hz) riden by their usual rider at specified markers in an arena. The sequence of supporting limbs was recorded for at least one stride before and after the transition by visual analysis of slow-motion video footage.	The type of transition was categorized according to whether or not intermediate steps occurred. Type 1 = No intermediate steps, the support sequence for one gait directly followed the support sequence for another gait. Type 2 = some intervening support sequences that didn’t normally occur in other gaits.	A higher level of training was positively associated with an increased percentage of type 1 transitions for both WT (p<0.05) and TW (p<0.01) transitions.	53.3
Argue and Clayton	1993	A study of transitions between the trot and canter in dressage horses	Journal of Equine Veterinary Science	13, 171-174	27 dressage horses at various levels from CEF Basic 1 to FEI GP	Experimental arena set up	Cross-sectional	Transitions: Trot-canter (TC) and canter-trot (CT)	Horses videoed (30 Hz). Data were analysed using Ariel Performance Analysis System.	Transitions were categorised in relation to limb sequence. TC, Type 1: initiated by a front limb, Type 2: initiated by a hindlimb. CT, Type 1: trot step immediately after suspension, Type 2: Placement of hindlimb during single front limb support prior to suspension.	No significant association between level of training and transition was found for either TC or CT.	46.7
Back, W., Barneveld, A., Bruin, G., Schamhardt, H.C. and Hartman, W.	1994	Kinematic detection of superior gait quality in young trotting warmbloods	Veterinary Quarterly	16, 91-96	24, 25 month-old Dutch WBs (11 geldings, 13 mares)	Experimental treadmill set up	Case study	Trot	Forelimb (FL) and hindlimb (HL) locomotion was measured using a modified CODA-3 kinematic gait analysis system at 300 Hz during trotting on a treadmill at 4 m/s. Measurements were compared to judged quality of overground trot using linear scoring system of KWPN studbook.	Stride duration, Stance duration, swing duration, Max pro/retraction and range, Scapula range of rotation, Shoulder joint motion, Elbow joint motion, Carpal joint motion, Fetlock joint motion, Pelvis motion, Hip joint motion, Stifle joint motion, Tarsal joint motion. Judged variables (score/40): Length, Strength, Suppleness.	Total judged scores of horses was 62 ± 10, so more medium trotting horses than superior or poor in the group. When stepwise regression of FL and HL variables were carried out together, only 3 variables were needed to describe the total variation in the gait score of the judge: FL stride duration, scapula rotation and FL maximal fetlock extension. When the 3 variables were correlated with each jud…	66.7
Biau, S. and Barrey, E.	2004	Relationship between stride characteristics and scores in dressage tests	Pferdeheilkunde	20, 140-144	10 young horses at 4, 5, and 6 years old. 9 experienced horses of 7 – 9, 11 and 13 years old.	Competition ( young horse tests and Prix St George tests)	Cross-sectional	Walk, trot, canter (straight line)	A 2D accelerometer was attached to the girth of the saddle against the sternum (between L & R pectoralis ascendens) to measure dorsoventral and longitudinal accelerations of the body at 50 Hz during a dressage test. Judges scores were also obtained from the test.	Accelerometer: Stride frequency, Stride regularity, Stride symmetry, Dorsoventral displacement, Dorsoventral activity, Vector of propulsion, Longitudinal activity, Vector of breaking. Judges marks: Movements mark, Collective mark, Total score.	Young horses: A large number of correlation were found between movement, collective and total marks for walk, trot and canter. Of these, the most frequently reported correlation across gaits and marks was dorsoventral displacement. For experienced horses, higher collective marks were correlated with stride variables for trot; stride regularity (0.23, p=0.01), lower longitudinal activity (-0.25, p…	42.9
Biau, S., Lemaire, S. and Barrey, E.	2002	Analysis of gait transitions in dressage horses using wavelet analysis of dorsoventral acceleration	Pferdeheilkunde	18, 343-350	15 dressage horses Inexperienced horses: five 4-year-olds, three 6-year-olds Experienced horses (n = 7) competing at national level.	Competition (1 inexperienced and 1 experienced dressage test)	Cross-sectional	Transitions: All horses; Trot-walk (TW), Trot-halt (TH), Walk-halt (WH), Canter-trot (CT). 6 yo and experienced horses only; Canter-walk (CW), Canter-halt (CH).	A 2D accelerometer was attached to the girth of the saddle against the sternum (between L & R pectoralis ascendens) to measure dorsoventral and longitudinal accelerations of the body at 50 Hz.	Variables defined for quantifying the time frequency energy spectrum of Morlet’s Wavelet Analysis for each transition (all measured during transition): Transition duration, Dorsoventral activity, Averaged energy, Averaged energy variation, Breaking deceleration, Averaged frequency, Averaged frequency variation, Frequency fluidity, Energy fluidity.	Results on training influence only. Transition duration increased significantly with increased training level (P<0.05) for TW, CH and CT transitions. Significant decreases in energy variation (CH, TH, p<0.05) and frequency variation (CT, P<0.05) were found with increasing training level. Significant increases in frequency fluidity with increasing training level were found for all canter transitio…	46.7
Clayton, H.M.	1997	Classification of collected trot, passage and piaffe based on temporal variables	Equine Veterinary Journal	29, 54-57	10 Olympic Dressage finalists (1992 Barcelona): 8 geldings, 2 stallions. 3 Westphalian, 2 Hanoverian, 1 Holsteiner, Oldenburg, Dutch WB, Danish WB, Russian WB. Aged 8 – 15 years.	Competition (GP and GP Special tests at 1992 Barcelona Olympics)	Cross-sectional	Collected trot, Piaffe, Passage	Sagittal plane, 60 Hz video recordings of dressage test in field of view. Cameras oriented to the horses’ plane of motion with a field of view of approx 10 m. 3 strides per movement analysed per horse. Gait events determined visually.	Stride duration, FL stance duration, HL stance duration, Diagonal stance duration, FL overlap, HL overlap, Diagonal overlap, Suspension, Diagonal dissociation at placement and lift off.	Passage performed as moderate running gait in 3 horses that were highly placed. The 3 highest placed horses had a diagonal sequence and diagonal dissociation was positive in all horses. Piaffe was performed as a slow running gait in the 5 highest placed horses. Only the winner of the competition had a diagonal sequence in piaffe. In collected trot diagonal dissociation was negative for the 2 lowe…	85.7
Deuel, N.R. and Park, J.	1990	Canter lead change kinematics of superior Olympic dressage horses.	Journal of Equine Veterinary Science	10, 287-298	19 Olympic dressage horse-rider combinations.	Competition (Individual finalist competition at the Seoul Summer Olympic Games 1988).	Cross-sectional	Extended canter, 2 Tempi, 1 Tempi	Filmed with two 16 mm cameras at 100 Hz. Cameras aimed perpendicular to HXF and MXK diagonals. Cameras field of view was 14 – 15 m. Limb contact timing variables calculated based on visual determination of hoof impact and lift off events. Gait variables compared to judges scores.	Linear measurements: Stride length, Step length, Swing length. Temporal measurements: Stride frequency, Stance duration, swing duration, Between limb timing, Diagonal dissociation. Stride velocity	Every canter stride variable measured differed significantly (P<0.05) between horses. EXTENDED CANTER Higher scores were associated with higher velocities (p<0.01), longer stride lengths (p<0.0001), but had no significant relationship with stride frequency. 11 combined temporal variables were found to be associated with higher GPS scores (R2 = 0.90, P<0.0001). 5 combined linear measurements were …	57.1
Deuel, N.R. and Park, J.J.	1990	The gait patterns of Olympic dressage horses.	Journal of Applied Biomechanics	6, 198-226	18 horse-rider competitors in the Olympic team dressage competition. GP test 15 horse-rider competitors in the Olympic individual dressage finalist competition. GP Special test.	Competition (Team dressage competition and individual finalist competition at the Seoul Summer Olympic Games 1988).	Cross-sectional	Grand Prix (GP) Team Competition: Extended trot, Extended walk, Extended canter. Grand Prix Special (GPS) Individual Competition: Extended trot, 1 Tempi, 2 Tempi, Extended canter	Filmed with two 16 mm cameras at 100 Hz. Cameras aimed perpendicular to HXF and MXK diagonals. Cameras field of view was 14 – 18 m. Limb contact timing variables calculated based on visual determination of hoof impact and lift off events. Judges score compared to gait variables.	Linear measurements: Stride length, Step length, Swing length. Temporal measurements: Stride frequency, Stance duration, swing duration, Between limb timing, Diagonal dissociation. Stride velocity	EXTENDED WALK Velocity, stride length and stride duration were not significantly related to GP score or finishing place. EXTENDED TROT Velocity, stride length and stride duration were not significantly related to GP score or finishing place. Velocity and stride length were found to be positively related to GPS score (GPS score = 278 ± 19.9 (velocity) (R2 = 0.53, P<0.0001)) (GPS score = 230 ± 279 …	57.1
Holmstrom, M. and Drevemo, S.	1997	Effects of trot quality and collection on the angular velocity in the hindlimbs of riding horses	Equine Veterinary Journal	Supplement., 62-65	Group I: 4 approved Swedish Stallions with mean trot scores 9.25 ± 0.96 (out of 10, range 8 - 10) during official performance tests. 164.2 ± 1.3 cm. Group II: 4 riding school geldings. 162.8 ± 1.7 cm. Mean trot scores 5.50 ± 1.29 (out of 10, range 4 - 7)	Experimental set up	Cross-sectional	Group I and II; Trot. GP; Working trot, Collected trot, Passage, Piaffe, In-hand trot.	Videography (250 Hz) and 2D kinematics. Horses filmed on left side 40 m away in sagittal plane for Group 1 and II horses and 28 – 40 m for GP horses. Group I and II horses ridden by one professional rider. Grand Prix Horses ridden by their ordinary rider. 4 strides analysed per horse.	Angle and angular velocity: Hind limb pro/retraction, Pelvic inclination, Femur inclination, Hock joint, Fetlock joint.	DIFFERENCES BETWEEN GROUP I AND II. In the last 60% of stance phase, all variables except femur inclination showed significant differences between horse group I and II. The angular velocity of hindlimb retraction was significantly faster in Group I (Good horses) during 65 – 90% stance phase. Angular velocity of the hock joint was significantly larger in Group I during 20 – 55% and 75 – 85% stance…	53.3
Holmström, M., Fredricson, I. and Drevemo, S.	1994	Biokinematic differences between riding horses judged as good and poor at the trot.	Equine Veterinary Journal	26, 235-40	Group 1 (GOOD TROT): 4 approved Swedish WB stallions, gait score 9.25 ± 0.96. Group 2 (POOR TROT): 4 riding horse geldings, gait score (5.50 ± 1.29).	Experimental set up	Cross-sectional	Trot	Filmed from left hand side with the use of a panning camera at 250 Hz. Four strides of each horse were then analysed using the TrackEye system. One rider rode all horses.	Speed, Stride duration, Stride length, Stance duration, Pro/retraction, Diagonal dissociation at footstrike, Diagonal dissociation at lift off, Hoof trajectory, Scapula inclination, Shoulder joint angle, Elbow joint angle, Carpus joint angle, FL and HL Fetlock joint angle, Pelvis inclination, Femur inclination, Stifle joint angle, Hock joint angle	Group 1 (GOOD) horses had significantly longer stride duration (p<0.001), hind stance duration (p<0.01) and larger positive diagonal dissociation (p<0.01) than Group II (POOR) horses. Group II (POOR) had significantly greater FL (p<0.0.01) and HL duty factor (p<0.05). FL swing phase retraction was longer (22%) in Group I (GOOD) than GROUP II (10%), but no difference in HL retraction. FL and HL pr…	66.7
Lashley, M. J., Nauwelaerts, S., Vernooij, J. C., Back, W. and Clayton, H. M.	2014	Comparison of the head and neck position of elite dressage horses during top-level competitions in 1992 versus 2008	Veterinary Journal	202, 462-5	Olympic competitors 1992 (OG 1992) (n = 15): age 11 ± 2.5 (range 8 – 16) years, 11 geldings, 4 stallions. All WB. 2008 World Cup Final (WC 2008) (n =15): age 13.5 ± 2.6 (range 9 – 18) years, 2 mares, 11 geldings, 2 stallions.	Competition (1992 Olympic Games/2008 World Cup)	Case comparison study	Collected canter (CC), Collected trot (CT), Passage (Pa), Piaffe (Pi)	Sagittal plane video recordings (60 Hz for 1992, 50 Hz for 2008). Camera oriented perpendicular to short side of dressage arena. Videos analysed frame by frame using Dartfish. Head angles scored per frame throughout one stride of each gait. Head angles compared to judges scores.	Head angles: ≥90 degrees = nose vertical or rostral to poll = not behind vertical (NBHV), 90 degrees = on the vertical, >90 degrees = in front of vertical (IFV), <90 degrees = nose caudal to poll = behind the vertical (BHV)	For CC and CT at OG 1992 and for all gaits/ movements studied at WC 2008, horses were NBHV <50% of the time. For Pa and Pi, the chance that a frame would be NBHV at WC 2008 was 0.26 (95%: 0.08-0.79) and 0.23 (95%:0.08-0.71) respectively, compared to OG 1992 (p<0.05). The mean head angle in Pi and final score for WC 2008 showed a significant negative correlation (-0.54, p<0.05), BHV was seen in hi…	80
Morales, J.L., Manchado, M., Vivo, J., Galisteo, A.M., Agüera, E. and Miró, F.	1998	Angular kinematic patterns of limbs in elite and riding horses at trot	Equine Veterinary Journal	30, 528-533	28 Spanish purebred stallions. Group UT – n = 9 stallions with no form of training, spending most time in a stable. Group T – n = 19 stallions used for elite dressage (some belonging to the Spanish Olympic Team) and had daily exercise	Experimental set up	Cross-sectional	Working trot, In-hand trot.	Videography (25 Hz) – camera placed 11 m away from a 20 m track used for data collection. Camera oriented in sagittal plane on horses right side and zoomed to get an 8 m field of view (2 consecutive strides). Horses filmed in-hand or ridden by their normal rider (for Group T only). 6 trials conducted per horse.	Fore and hindlimb joint angles. Angular stride parameters. Temporal stride parameters.	Differences between groups are for the unridden condition only. Elite horses exhibited significantly greater elbow extension (P<0.05) than untrained horses. Carpal joint of elite horses were significantly less flexed than untrained horses at lift off (P<0.0001), but from lift off to maximum flexion, elite horses had significantly greater flexion (P<0.01). Fore fetlock angles were significantly mo…	73.3
Tans, E., Nauwelaerts, S. and Clayton, H.M.	2009	Dressage training affects temporal variables in transitions between trot and halt	Comparative Exercise Physiology	6, 89-97	Novice (n =15) Intermediate (n=15) Advanced (n =15) dressage horses	Competition (USDA/Barcelona Olympic Games during GP test)	Case comparison study	Transitions: trot-halt (TH) and halt-trot (HT)	Video recordings (60 Hz) of transitions were analysed using Dartfish	Duty factor, Diagonal dissociation at contact, Diagonal dissociation at lift off, Suspension	During the TH transition duty factor decreased and diagonal disociation remained positive for longer with increasing level and only advanced horses had a suspension phase. During the HT transition, trot was initiated earlier with a longer suspension phase and more positive diagonal disociation steps with increasing level.	66.7
von Borstel, U.K. and Glißman, C.	2014	Alternatives to conventional evaluation of rideability in horse performance tests: suitability of rein tension and behavioural parameters.	PloS one	9, e87285	46 German Riding Horses. 33 mares, 13 stallions, aged 3 (n = 35) or 4 (n = 11).	Each horse observed twice during two dressage training sessions	Cross-sectional	Various	Rein tension measured using rein tension meter. Rideability scores evaluated in performance test obtained from testing stations after tests.	Rein tension: Mean, Maximum, Variance Calculated for each ride separately, but combined for left and right rein. Absolute difference between left and right rein calculated as asymmetry measure for each horse-rider pair. Rdeeability scored: Sujectively measured out of 10.	Horses received rideabilty scores of 7.75 ± 0.65 (out of ten). Three main rein tension parameters were found to account for the largest variation in rideability scores (maximum tension – 17%, mean rein tension 16%, variability of rein tension 15%). Rideability scores dropped significantly (P<0.05) with increasing mean, maximum and variability in rein tension (i.e. -0.37 ± 0.14 scores per addition…	92.9
