# Supplementary material for: A scoping review of determinants of performance in dressage
Source: PeerJ. 2020 Apr 24;8:e9022. doi: 10.7717/peerj.9022 (PMC7185025; doi:10.7717/peerj.9022)
Supplement: Table S7 [file peerj-08-9022-s007.xlsx]

## Sheet: Sheet1
Author	Date	Title	Overarching Focus (Physiology, Biomechanics)	Participants	Setting	Study Design	Methods	Journal	Volume, Page	Overarching Focus (Physiology, Biomechanics)	Participants	Setting	Study Design	Methods	Outcome Measures	Results	Quality Score
Alexander, J., Hobbs, S.-J., May, K., Northrop, A., Brigden, C. and Selfe, J.	2015	Postural characteristics of female dressage riders using 3D motion analysis and the effects of an athletic taping technique: A randomised control trial	Biomechanics					Physical Therapy in Sport	16, 154-161	Biomechanics	Riders (n = 10): female, age 29 ± 6.4 years, body mass 59 ± 6.2 kg and height 164.0 ± 5.0 cm. All riders right foot and hand dominant. All BHS level 3 and above, rode dressage on a minimum weekly basis and competed at minimum BD Novice level competitions.	Experimental Arena Set Up	Pre-test Post-test	3D kinematic data collected from riders and horse at sitting trot in straight line trials. Markers were placed on the riders: acromion processes, either side of T1 and T12 and L4, ASIS, PSIS, illiac crests and greater trochanters. Markers attached to horse's point of hip and shoulder. Data were collected pre and post ahtletic taping intervention (a combination of Watson’s strap and scapular retra…	Trunk segment flexion/ extension, lateral flexion (left/right), axial rotation (left/right) (°). Pelvic anterior/posterior tilt, lateral flexion (left/right), axial rotation (left/right) (°). Range (min and max values for each movement) Absolute difference (difference between left and right values) Asymmetry (=100[R-L/(R+L)	All riders showed postural characteristics and asymmetries pre-intervention, with the majority of riders showing dominant trunk left lateral flexion, forward flexion and right trunk rotation, right pelvic lateral flexion, posterior tilt and right pelvic rotation.Average trunk lateral flexion range significantly (p ≤ 0.05) increased during the intervention from 2.4° pre-intervention to 3° post int…	86.6667
Alfredson, H., Hedberg, G., Bergström, E., Nordström, P. and Lorentzon, R.	1998	High thigh muscle strength but not bone mass in young horseback-riding females	Physiology					Calcified Tissue International	62, 497-501	Physiology	Riders (n = 20): female, age 17.9 ± 0.6. Riding experience 10.0 ± 2.0 years (5 – 15 years) and riding 7.0 ± 0.6 hours per week at the time of the study. Did not participate in any other regular sport activities except for PE classes. Control group (n = 20): matched the study group according to age, height, weight. Low level of physical activity (<2 hours/ week outside of school).	Laboratory test	Cross Sectional	Total body Bone Mineral Density (BMD) determined for participants using a dual energy X-ray absorptiometer (DXA). Body fat mass and lean body mass also derived from total body scan. Isokinetic concentric and eccentric muscle strength of right quadricep femoris and hamstring muscles determined using a isokinetic dynamometer.	BMD (g/cm2) for: Total body, Head, Right femoral neck, Ward’s triangle, Lumbar spine (L2 – L4), Trochanter, Whole dominant and non-dominant humerus, Right femur diaphysis, Distal femur, Proximal tibia, Tibia diaphysis. Isokinetic concentric and eccentric muscle strength (Nm)	Horseback riding group had significantly (P<.05) higher: lean body mass, less body fat %, concentric and eccentric hamstring strength, eccentric quadriceps strength at 90°/second.	86.6667
Baillet, H., Thouvarecq, R., Verin, E., Tourny, C., Benguigui, N., Komar, J. and Leroy, D.	2017	Human Energy Expenditure and Postural Coordination on the Mechanical Horse						Journal of Motor Behavior	49, 441-457	Biomechanics and Physiology	Riders and non-riders (n = 22): female, age 24.3 ± 4.6, body mass 59.7 ± 7.3 kg, height 167.7 ± 4.8 cm. Horseback riders (n = 11): ≥ 5 years riding experience. Non-riders (n = 11): no riding experience. Participated in various sports 3.7 – 3.9 hr/ week.	Experimental Riding Simulator	Cross Sectional	Energy expenditure and postural coordination of participants on a riding simulator at 4 different oscillation frequencies (V0 - V3) 12.1 - 150 osc/min). Participants completed a 45 min session on riding simulator with increasing oscillation frequencies. 3D kinematic (100 Hz) data collected to assess postural coordination. 15 markers were placed on the rider and one on the mechanical horse (behind…	Energy expenditure: HR (bpm), Oxygen consumption (VO2), CO2 production (VCO2), Respiratory Quotient (RQ). Postural Coordination Measures (°): Elbow angle, Head segmental angle (vertical axis), Trunk segmental angle (vertical axis), Horse angle (marker positioned on horse and vertical axis), elbow-horse DRP, trunk-horse DRP, head-horse DRP	Trunk/horse relative phases showed significant effect of expertise and freqeuency (p<0.05) with riders oscillating antiphase with mechanical horse across all frequencies and non-riders moving out of phase at the highest frequency. Riders head oscillations were sig different from non-riders at V0, V1 and V2 and moved out of phase in V0 and moved quickly towards in phase at higher frequency. Variab…	84.6154
Beale, L., Maxwell, N. S., Gibson, O. R., Twomey, R., Taylor, B. and Church, A.	2015	Oxygen Cost of Recreational Horse-Riding in Females	Physiology					Journal of Physical Activity & Health	12, 808-813	Physiology	Riders (n = 20): female, age 17 - 54 years. Varying levels of riding experience and activity (very active, active and moderatly active)	Laboratory Exercise Test and Experimental Arena Set Up	Cross Sectional	Participants conducted a ridden test an incremental bicycle ergomer test until exhaustion. During the ergometer test, expired air analysed using portable calorimetry gas-exchange system. Participants completed a standardised 45 minute session based on BHS Stage 2 riding lesson. Rating of percieved exertion recorded from riders at 15 min intervals during the riding session and expired air collecte…	Horse Riding Session measures: Rating of Perceived Exertion (RPE), Oxygen uptake (VO2), CO2 production (VCO2), Respiratory exchange ratio (RER), Minute ventilation (VE), Metabolic Equivalent (MET), Energy Expenditure (kcal.min-1). Laboratory Cycle test: VO2, VO2max	Significant effects of riding activity were found, with trot/canter activity resulting in significantly greater VO2, %VO2peak, MET and Energy Expenditure than No stirrups activity (P=0.001). No sig diffs were found between walk/trot and the other riding activities (trot/canter, no stirrups).	86.6667
Bradshaw, E.J., Hamerton, W., Raves, A. and Noble, B.	2005	Physical power, technical and aesthetic execution qualities in dressage riding-a preliminary investigation	Biomechanics and Physiology					In: Wang, Q., ed. ISBS 23 International Symposium on Biomechanics in Sports, August 22 – 27, 2005 2005 Beijing, China.		Biomechanics and Physiology	Riders (n = 10): female, age 23 ± 9, height 173.7 ± 5.0 cm, weight 63.0 ± 6.5 kg. Trained in dressage.	Laboratory Exercise Test and Experimental Arena Set Up	Cross Sectional	Participants conducted ridden tests and laboratory tests of muscle strength and power. For the ridden test: riders rode an Intermediate Dressage test on a known horse also worked an unfamiliar horse through collected and extended gaits. Videogrpahy data (50 Hz) collected from ridden tests and subjectively judged by two Grade A Dressage NZ trainers. Trot and canter velocity determined from videogr…	Qualitative judged score (/40) for ridden test, qualitative judged score for rider posture(/18), collected trot and canter velocity (m/s), Brachial index (%), Tricep extension (kg), V-sit press (kg), Seated row (rpm), squat jump forces (BW).	A low brachial index was the key predictor of dressage riding performance (r = 0.92, r2= 0.85, p = 0.001) – talented riders have shorter forearms in relation to their upper arms. High concentric leg strength (squat jump force) and abdominal strength (v-sit press) were found to be good identifiers for good riding posture (r=0.91, r2=0.83, p = 0.005).	61.5385
Byström, A., Rhodin, M., Peinen, K.V., Weishaupt, M.A. and Roepstorff, L.	2009	Basic kinematics of the saddle and rider in high‐level dressage horses trotting on a treadmill	Biomechanics					Equine Veterinary Journal	41, 280-284	Biomechanics	Riders (n =7): 3 male, 4 female. Horses (n = 7): WB, height 1.70 ± 0.07 m. Actively competing at Grand Prix (n = 6) or FEI Intermediate (n = 1) level. All ridden by their normal riders.	Experimental Treadmill Set Up	Cross Sectional	3D kinematic (140 or 240 Hz) data collected from horses and riders in collected sitting trot on an instrumeted treadmill. Markers placed on horse, rider and saddle. Data collected for 15 seconds. Saddle and rider core body segments subjected to rigid body analysis. Rider upper arms and legs and the neck and trunk of the horse segment projection angles in the YZ and XZ planes were determined to pr…	Rider Upper Body, Pelvis, Head segment angles (°) (Roll, Pitch, Yaw). Shoulder, elbow, knee joint angles (°). Riders position in relation to horse calculated as linear distances (mm): Riders hand to the rostral end of the ipsilateral crest of the horse, X-distance from the riders C7 to the L3 spinous process of the horse, X and Z-distances from riders seat (mean of left and right trochanter) and …	From first contact to midstance the riders seat moved downwards and cranially then caudally (large phase shift) and the neck moved cranially in relation to L3 of the horse. The shoulder and hip joints flexed and abducted, the elbow joints flexed and the knees flexed and adducted. At midstance all variables were in transition except roll and yaw of the saddle and yaw of the rider pelvis. From mids…	71.4286
Byström, A., Rhodin, M., Von Peinen, K., Weishaupt, M.A. and Roepstorff, L.	2010	Kinematics of saddle and rider in high‐level dressage horses performing collected walk on a treadmill	Biomechanics					Equine Veterinary Journal	42, 340-345	Biomechanics	Riders (n =7): 3 male, 4 female, weight 78 ± 17 kg. Horses (n = 7): WB, height 1.70 ± 0.07 m. Actively competing at Grand Prix (n = 6) or FEI Intermediate (n = 1) level. All ridden by their normal riders.	Experimental Treadmill Set Up	Cross Sectional	3D kinematic (140 or 240 Hz) data collected from horses and riders in collected walk (1.45 - 1.47 m/s) on an instrumeted treadmill. Markers placed on horse, rider and saddle. Data collected for 15 seconds. Saddle and rider core body segments subjected to rigid body analysis. Rider upper arms and legs and the neck and trunk of the horse segment projection angles in the YZ and XZ planes were determ…	Rider Upper Body, Pelvis, Head segment angles (°) (Roll, Pitch, Yaw). Shoulder, elbow, knee joint angles (°). Riders position in relation to horse calculated as linear distances (mm): Riders hand to the rostral end of the ipsilateral crest of the horse, X-distance from the riders C7 to the L3 spinous process of the horse, X and Z-distances from riders seat (mean of left and right trochanter) and …	In the first half of left HL stance the rider’s seat moved forwards and downwards in relation to L3 and upwards in relation the the pommel. The neck moved backwards in relation to L3. Shoulder and hip joints extended and elbow joints extended less than 6 degrees. Thighs abducted and toes moved backwards in relation to the hips. In the second half of hindlimb stance rider variables generally showe…	78.5714
Byström, A., Roepstroff, L., Geser-von Peinen, K., Weishaupt, M.A. and Rhodin, M.	2015	Differences in rider movement pattern between different degrees of collection at the trot in high-level dressage horses ridden on a treadmill	Biomechanics					Human Movement Science	41, 1-8	Biomechanics	Riders (n =7): 3 male, 4 female. Horses (n = 7): WB, height 1.70 ± 0.07 m. Actively competing at Grand Prix (n = 6) or FEI Intermediate (n = 1) level. All ridden by their normal riders.	Experimental Treadmill Set Up	Cross Sectional	3D kinematic (140 or 240 Hz) data collected from horses and riders in trot on an instrumeted treadmill during: Stance, Free trot (unrestrained horse, loose rein), Passage (only the GP horses) and Collected trot at three speeds (3.20 ± 0.28 m/s). Markers placed on horse, rider and saddle and data collected for 15 seconds per movement. Rider upper body and pelvis, subjected to rigid body analysis a…	Rider Upper Body and Pelvis segement pitch rotation (°) (Segment rotations for upper body calculated in relation to rider pelvis). Riders position in relation to horse calculated as linear distances (mm): Longitudinal distance from rider C7 to L3 of horse, Longitudinal and; vertical distance from riders seat (mean of left and right trochanter) and L3 of horse, Vertical distance from riders knee t…	Rider’s pelvis was more cranially rotated and the upper body more caudally rotated in relation to the pelvis (indicating increased flexion of the lumbar back) with increasing speed and longitudinal distance from riders C7 to horses L3 was larger.	66.6667
Clayton, H.M., Singleton, W.H., Lanovaz, J.L. and Cloud, G.L.	2003	Measurement of rein tension during horseback riding using strain gage transducers	Biomechanics					Experimental Techniques	May/June, 34-36	Biomechanics	Rider (n = 1) and horse (n = 1) trained to a high level in dressage	Experimental Arena Set Up	Case Study	Rein tension data (1000 Hz) and videography collected from both reins during trot and canter trials on a straight line. Data collected for 5 second intervals and rider instructed to ride with equal tension in both reins. Kinematic gait events determined visually from video data.	Rein Tension (N) (left and right rein) Magnitude and frequency of spikes in rein tension.	Rein tension data showed that it was characterized by a series of spikes (varying in magnitude and frequency) that coincided with gait events. Trot showed two spikes per stride – corresponding with diagonal stance phases Canter showed one spike per stride – corresponding with the diagonal limb pair stance. These spikes appeared to be most related to the cyclic nodding motions of the horses head, …	64.2857
Clayton, H.M., Singleton, W.H., Lanovaz, J.L. and Cloud, G.L.	2005	Strain gauge measurement of rein tension during riding: a pilot study	Biomechanics					Equine and Comparative Exercise Physiology	2, 3, 203–205	Biomechanics	Experienced competition rider (n = 1) and horse (n = 1) chosen for being notorious for leaning hard against the reins.	Experimental Arena Set Up	Case Study	Rein tension data (1000 Hz) collected from the left rein during walk, trot and canter trials on a circle. Data collected for 5 second intervals and rider instructed to ride strongly and accept as much tension on the reins as the horse would offer.	Rein Tension (N) (left rein only)	A pattern of spikes at all gaits was found with consistent frequencies of 108 per min at walk, 168 per min at trot and 90 per min at canter. Maximum values of rein tension peaks ranged from; 4 – 43 N at walk, 19 – 51 N at trot, and 21 – 104 N at canter.	64.2857
de Barros Souza, F., Pacheco, M. T. T., Strottmann, I. B., Teixeira, C. G. P., Fortes, C. E. A., Lyon, J. P., Moreira, L. M. and OsÃ³rio, R. A. L.	2008	Metabolic and cardiorespiratory parameter analysis of young female adults during horseback riding at a walking gait	Physiology					Isokinetics and Exercise Science	16, 263–267	Physiology	Non-Riders (n = 11): aged 17–23 years, weight 58 ± 8 kg, height 1.64 ± 0.07 m. None ever trained in horse riding and lead sedentary lifestyles.	Experimental Arena Set Up	Cross Sectional	portable gas analyzer attached to particpants during rest and movement on horseback to determine metabolic and cardiorespiratory measures. Participants wore the gas analyser during sitting for 5 minutes. Participants then mounted the horse using a cloth-lined foam blanket instead of a saddle. An instructor led the horse in walk using a headcollar for 15 minutes.	Oxygen uptake (VO2) (ml.kg/ min), METs (u.a.), HR (bpm), Caloric expenditure (kcal/ min)	VO2, MET and caloric expenditure were all significantly greater in the first 1 – 5 min of horse riding compared to resting values (P<0.05). MET at 5 – 10 min and 10 – 15 min were also found to be significantly greater than resting value (P<0.05). VO2 at 10 – 15 min was found to be significantly lower than the initial 1 – 5 min of ridden exercise (P<0.05).	78.5714
de Cocq, P., Mooren, M., Dortmans, A., van Weeren, P. R., Timmerman, M., Muller, M. and Van Leeuwen, J. L.	2010	Saddle and leg forces during lateral movements in dressage	Biomechanics					Equine Veterinary Journal Supplement	644-649	Biomechanics	Riders (n = 9): 1 male, 8 female, age 24.3 ± 5.8 years, weight 66.7 ± 8.0 kg, height 1.73 ± 0.08 m. Horses (n = 11): 9 geldings, 1 stallion, 1 mare. WB (n = 10), Fjord (n = 1). Age 9.7 ± 2.5 years, weight 572.3 ± 53.0 kg, height 1.70 ± 0.09 m. Horse and rider combinations had a training level of at least Intermediate dressage.	Experimental Arena Set Up	Cross Sectional	Saddle force (26 Hz) (N) and videography data collected from horse and rider combinations during sitting trot in three conditions: Straight line, Shoulder-in, Travers. Saddle force systems placed under the saddle and on the left and right sides under the saddle flaps. Saddle force calculated as summation of magnitudes measured by individual sensors of the saddle device. Differences between inside…	Saddle force measures for each trail: Mean force, Difference between inside and outside force, Maximum force, main fundamental frequency Judged scores 0 – 10 for each movement. Trials above 5.5 = correct.	Mean total saddle force sig lower (P = 0.006) in straight line (671 ± 143 N) than shoulder in (707 ± 150 N) or travers (726 ± 165 N). Maximum saddle force difference between outside and inside of saddle was significantly higher (P<0.05) for shoulder in (75.0 ± 212.0) compared to straight (38.3 ± 189.9) and travers (-3.4 ± 197.0). Maximum outside leg force significantly higher (P<0.05) when riding…	85.7143
Devienne, M. F. and Guezennec, C. Y.	2000	Energy expenditure of horse riding	Physiology					European Journal of Applied Physiology	82, 499-503	Physiology	Experienced riders (n = 5): 3 women, 2 men, age: 26 ± 6.16, height 1.72 ± 0.08 m, mass 58.2 ± 11.1 kg. Rode an average of 7 hours per week. Didn’t train intensely and didn’t have occupations that were physically demanding.	Laboratory Exercise Test and Experimental Arena Set Up	Cross Sectional	Preliminary bicycle-ergometer test until exhaustion to assess maximal oxygen uptake. Participants also took part in two riding tests, a dressage and a jumping session (jumping results not presented here). For the dressage session, each rider rode 4 different horses of different dispositions (i.e. lethargic, nervous) and performed 4 min of walk, trot and canter (12 min of data per horse). For ridi…	Bicycle Ergometer Test: Oxygen uptake (VO2) (L/min), Maximal Oxygen Uptake (VO2max) (L/min), Pulmonary Ventilation (VE) (L/min), HR (bpm). Ridden Tests: VO2 (L/min), VE (L/min), HR (bpm).	Progressive significant increase in VO2, HR and VE were observed from walk to canter (P<0.05). Steady state in VO2 was obtained during walking and cantering, and after 1 min of trotting. VO2, HR and VE were found to differ significantly between horse being ridden (P<0.05). Significant differences were observed between riders in the energy expenditure calculated when riding the four horses in dres…	76.9231
Eckardt, F., Münz, A. and Witte, K.	2014	Application of a full body inertial measurement system in dressage riding	Biomechanics					Journal of Equine Veterinary Science	34, 1294-1299	Biomechanics	Professional dressage riders (n = 10): 8 female, 2 male. Age 23.4 ± 5.6 years. BMI 21.5 ± 2.5 kg/m2. ≥17 years of riding experience. Horses (n = 8): 8 geldings, 2 mares, age 7.9 ± 4.2 years, height 170 ± 3.5 cm.	Experimental Arena Set Up	Cross Sectional	IMU data (120 Hz) (Xsens) and videography data collected from riders in sitting trot straight line trials. For each outcome measure, Waveform similarity calculated over 30 strides to evalutate inter-trial repeatability .	Head, trunk (sternum) and pelvis angles (°) around mediolateral (roll) and sagittal (pitch) planes. Elbow and knee joint angles (°) (flexion/ extension) Mean ± sd for each measure over 30 strides calculated and the following determined from mean waveforms: Mean posture, ROM, Max, Min.	Across all 30 strides/ waveforms all analyzed coefficient of multiple correlations were moderate to very good. The highest being for trunk acceleration and the smallest for pitch of rider’s head. Generally, Roll waveforms had a higher correlation than pitch. ROM values of Roll were also greater than ROM of pitch for all segments. ROM of rider pelvis was sig greater than trunk for roll (p≤0.01). R…	85.7143
Eckardt, F. and Witte, K.	2016	Kinematic analysis of the rider according to different skill levels in sitting trot and canter.						Journal of Equine Veterinary Science	39, 51-57	Biomechanics	Professional (PRO) riders (n = 10): 8 female, 2 male, age 23.4 ± 5.3 years, BMI 21.5 ± 2.5 kg/m², experience 33.9 ± 11.9 years. Beginner (BEG) riders (n = 10): 7 female, 3 male, age 20.2 ± 5.7 years, BMI 21.6 ± 2.6 kg/m², experience 3.2 ± 1.9 years. Professional horses (n = 10): WB, 8 geldings, 2 mares, age 7.9 ± 4.2 years, height 170 ± 3.5 cm. Trained by FN Beginner horses (n = 10): WB, 7 geldin…	Experimental Arena Set Up	Cross Sectional	IMU data (120 Hz) (Xsens), accelerometer (120 Hz) and videography data synchronously collected from riders in sitting trot and left-lead canter straight line trials. IMU placed centrally on horse's girth (next to sternum) to collect horse trunk movement data (120 Hz). 3D accelerometer attached to horse's left cannon bone to identify gait events. Kinematics of horse’s trunk, rider’s head, trunk an…	Kinematic angular measures: horse trunk segment and rider head segment, pelvis segment, trunk segment, elbow joint, knee joint angles in roll and pitch (°). For each kinematic measure, range of motion (ROM), mean, max and min values calculated from averaged, normalized stride data.	In sitting trot, BEG riders tilted their head and trunk significantly more forward than PRO (roll head movement min (p =0.04), mean (p=0.04). Roll trunk movement max (P=0.026) and mean (p = 0.04)). In pitch, both the PROs and BEGs trunks sloped to the right side. Both left and right elbow and knee joints showed significant differences between groups, with the PRO riders exhibiting greater elbow f…	66.6667
Egenvall, A., Eisersiö, M., Rhodin, M., van Weeren, R. and Roepstorff, L.	2015	Rein tension during canter	Biomechanics					Comparative Exercise Physiology	11, 107-117	Biomechanics	Professional riders (n = 8): height - 173 ± 6 cm, 65.5 ± 10 kg. All worked as riding instructors or horse trainers. Riders competed at advanced (n = 2), Intermediate (n = 5), and basic (n = 1) level dressage. 1 rider left handed and all others were right. Horses (n = 24): WB, 14 geldings, 9 mares, 1 stallion. Age: 4 to 27 years (median 8 years). Height 135-180 cm (median 165cm). Training level: b…	Experimental Arena Set Up	Cross Sectional	Rein tension meters (0 – 500 N) fitted to both reins. IMU sensor attached underneath horse's browband. Rein tension (128 Hz), IMU and videography (25 Hz) data collected from horse and rider combinations during their normal riding routine with each of their horses for flatwork or dressage in walk, trot and canter. Video data were scrutinized to catergorise riding exercises from each session. Data …	Left and Right Rein Tension (N) data during canter grouped during the following exercise catetories: left and right lead canter, Riders position (sitting, light seat, posting), Corners and turns (corner left/ right, turn left/right), Lateral movements (half-pass left/right, shoulder in left/right, leg-yield left/right), Riding in collection or lengthening. Nose angle ROM and Nose angle orientatio…	Significant differences (p<0.001) in rein tension were found between horse levels: Advanced horses (24.2 N) and young horses (28.7 N) had higher tension than basic horses (13.3 N). Lengthening (25 N) had a higher rein tension than collecting (15.5 N). Tension was higher in a forward nose (20.2 N) than a backwards nose (19.7 N). Max rein tension was found just before or after the beginning of LdF …	85.7143
Eisersiö, M., Roepstorff, L., Weishaupt, M.A. and Egenvall, A.	2013	Movements of the horse’s mouth in relation to horse–rider kinematic variables	Biomechanics					The Veterinary Journal	198, e33-e38	Biomechanics	Riders (n = 7): 3 males, 4 females, weight: 78 ± 17 kg Horses (n = 7): WB, height 1.70 ± 0.07 m, trained to Grand Prix level (n=6) and intermediate level (n=1).	Experimental Treadmill Set Up	Cross Sectional	3D kinematic (140 or 240 Hz), force (420 or 480 Hz), rein tension (140 Hz) and videography (25 Hz) data synchronously collected from horses and riders in trot on an instrumeted treadmill during two head and neck position (HNP) conditions: HNP1 - loose rein, unrestrained and HNP2 – neck raised, poll high, nose slight in front of vertical (dressage competition). Kinematic markers placed on horse's …	Left and right rein tension (N) Kinematic variables: Distance T6 – mouth (mm), Left and right mouth – hand (mm), Left and right T6 – hand (mm), Left and right L3 – hand (mm), Nose angle of horse’s head (°) (defined by horizontal plane, eye and mouth)	Results for both HNPs were similar apart from mouth – hand where max distances occurred during suspension phase for HNP2 and first part of stance for HNP1. * Mid stance was associated with maximum “nose angle” and maximum L3 – hand distance. * In the multivariable kinematic model, all variables except speed and HNP were significant. Percentages of stride from 12 – 37% and 60 – 76% had a significa…	78.5714
Eisersiö, M., Rhodin, M., Roepstorff, L. and Egenvall, A.	2015	Rein tension in 8 professional riders during regular training sessions	Biomechanics					Journal of Veterinary Behavior: Clinical Applications and Research	10, 419-426	Biomechanics	Professional riders (n = 8): height - 173 ± 6 cm, 65.5 ± 10 kg. All worked as riding instructors or horse trainers. Riders competed at advanced (n = 2), Intermediate (n = 5), and basic (n = 1) level dressage. 1 rider left handed and all others were right. Horses (n = 24): all trained regularly by participants. Training level: basic (n=6)(low-level competition ), young horse (n=3)(ridden for less …	Experimental Arena Set Up	Cross Sectional	Rein tension meters (0 – 500 N) fitted to both reins. IMU sensor attached underneath horse's browband. Rein tension (128 Hz), IMU and videography (25 Hz) data collected from horse and rider combinations during their normal riding routine with each of their horses for flatwork or dressage in walk, trot and canter. Video data were scrutinized to catergorise riding exercises from each session.	Left and right rein tension data (N) grouped during the following exercise categories: Gait (walk, trot, left and right lead canter), Riders position (sitting, light seat, posting), Corners and turns (corner left/ right, turn left/right), Lateral movements (half-pass left/right, shoulder in left/right, leg-yield left/right), Riding in collection or lengthening (trot, canter)	Descriptive statistics showed substantial variation between gaits (walk [median 12 N both reins], trot [median 14 – 19 N left/right reins and sitting/posting], canter [median 13 – 24 N left/right reins and sitting/light seat).	85.7143
Gandy, E.A., Bondi, A., Hogg, R. and Pigott, T.M.	2014	A preliminary investigation of the use of inertial sensing technology for the measurement of hip rotation asymmetry in horse riders	Biomechanics					Sports Technology	7, 79-88	Biomechanics	Riders (n = 7): 6 females, 1 male. Age 19 – 47 years (29 ± 11), weight 62 ± 6.7 kg, height 161.8 ± 6.75. Minimum experience level equivalent to affiliated novice dressage.	Experimental Arena Set Up	Cross Sectional	Twelve horse and rider combinations used for study (riders rode multiple horses, but the number of horses ridden varied). IMU data (120 Hz) collected from riders using Xsens suit. Data collected from riders at rising trot during: straight line (left and right rein) and 20 m circle (left and right rein) trials, with rests in between. A standing trial was also conducted on the horse and with the ri…	External rotation of left and right hip Hip rotation asymmetry	All riders showed asymmetry in hip rotation angles ranging from 1 - 27°. 10 of the 12 riding combinations (83%) showed greater external rotation of the right hip. A significant difference between mean hip rotation asymmetry for the left rein (t(11)=3.722, p = 0.003) was found, but no significant difference for the right rein (t(11)=0.745, p = 0.472).	92.8571
Kang, O.D., Ryu, Y.C., Ryew, C.C., Oh, W.Y., Lee, C.E. and Kang, M.S.	2010	Comparative analyses of rider position according to skill levels during walk and trot in Jeju horse.	Biomechanics					Human Movement Science	29, 956-963	Biomechanics	Advanced riders (n = 3): age: 39.67 ± 3.5, height 159.7 ± 11.2 cm, weight 58.67 ± 12.9 kg. All female and riding instructors and Stage III. >5 years riding experience. Beginner riders (n = 6): age: 32.83 ± 11.5, height 162.17 ± 3.3 cm, weight 58.50 ± 10.0 kg. No riding experience.	Experimental Arena Set Up	Before and After	Videography data (60 Hz) collected from beginner riders at baseline, 12-weeks and 24 weeks during a training intervention. Training was conducted for 1 hour, twice a week for 24 weeks. Data collected from advanced riders at baseline only. Data were collected from riders during walk and rising trot on a straight line (rising trot excluded from baseline measures of beginners). Gait events visually …	Joint angles (°): shoulder, hip, knee, ankle, anterior-posterior trunk, medio-lateral trunk.	At the start of training, at walk; beginners elbow and shoulder joints were significantly more flexed, knee and ankle joints were significantly different than advanced riders, and the trunk was in a forwards position. At trot; the beginners knee, elbow and shoulder joints were significantly more flexed, and the trunk was more forwards. After 24 weeks of training, at walk; elbow, shoulder, knee an…	62.5
Kim, M. J., Kim, T., Oh, S. and Yoon, B.	2018	Equine Exercise in Younger and Older Adults: Simulated Versus Real Horseback Riding	Physiology					Perceptual and Motor Skill	125, 1, 93–10	Biomechanics	Four experimental groups: Horse riding simulator (RS) younger adults (n = 10): 26.7 ± 3.5 years, 167.2 ± 9.1 cm. 60.6 ± 12.3 kg, male 5, female 8 RS older adults (n= 11): 68.4 ± 5.8 years, 160.9 ± 9.1 cm, 64.5 ± 11.7 kg, male 6, female 5 Horse riding (HR) younger adults (n=17): 20.8 ± 2.6 years, 166.0 ± 8.2 cm, 60.6 ± 9.6 kg, male 8, female 9 HR older adults (n=8): 60.5 ± 9.6 years, 161.3 ± 64 cm…	Experimental Treadmill Set Up and Riding Simulator	Cross sectional	sEMG (1000 Hz) data collected for riding simulator (RS) and horse riding (HR) conditions for three gaits: walk (80 m/min), slow trot (135 m/min), fast trot: (159 m/min) (determined in previous study that found high correlation (r2 = 0.997) between these speeds for HR and RS conditions). Gaits performed on RS for 15 min with an 8 min rest period. HS performed using horses on an equine treadmill an…	Normalised (to MVC) muscle activity and iEMG for Erector spinae (ES), Internal oblique (IO), Rectus femoris (RF), Rectus abdominis (RA) muscles.	Overall muscle activity was significantly higher for all muscles during RS across all participants (P<0.05). IO activation was significantly highest at slow trot (P<0.05) with no significant effect of gait found for the other muscle (ES, RA, RF, p>0.05). Activity was significantly higher in IO than in ES at all three gaits (P<0.05). Activation was higher for the RS regardless of gait (P<0.05). Ac…	93.3333
Kuhnke, S., Dumbell, L., Gauly, M., Johnson, J.L., McDonald, K. and von Borstel, U.K.	2010	A comparison of rein tension of the rider's dominant and non-dominant hand and the influence of the horse's laterality	Biomechanics					Comparative Exercise Physiology	7, 57-63	Biomechanics	Riders (n = 11): 10 female, 1 male. Age 29 ± 15 years. Riding experience 18.5 ± 11.5 years and trained to German riding level A – M. Horses (n = 2): Trakehner geldings, aged 19 and 14. Trained to dressage level M and L. One right lateralised and one left lateralised.	Experimental Arena Set Up	Cross Sectional	Rein tension (100 Hz) data collected during ridden trials on a 20 m circle in walk, sitting trot and canter in each direction. Each rider rode both horses. Edinburgh Handedness Inventory used to determine rider handedness prior to testing. Horse laterality classified prior to testing using an owner questionnaire (Murphy and Arkins, 2008) and confirmed using a modified version of a preference test…	Mean, standard deviation, maxima and minima tension for each rein in each gait and direction	Regardless of gait, direction or rider, more continuous tension and higher peak tensions was observed on the rein of the horses preferred side. Significantly more tension was applied to the outside rein in a clockwise direction (P=0.0202) but significant differences between reins were not found for the counterclockwise direction (P=0.49). Rein tension differed significantly for each gait (P<0.000…	64.2857
Lagarde, J., Peham, C., Licka, T. and Kelso, J.S.	2005	Coordination dynamics of the horse-rider system.	Biomechanics					Journal of Motor Behavior	37, 418-424	Biomechanics	Professional (PRO) rider (n =1) (male, 33 years old, 65 kg). Recreational (REC) rider (n = 1) (female, 30 years old, 65 kg).	Experimental Arena Set Up	Cross Sectional	3D kinematic data collected from riders and horses ridden in working sitting trot in straight line past a motion capture system (120 Hz). Markers placed on rider's right temporal region, shoulder, hip, elbow, hand, hip, knee, heel, tip of boot.	Extracted vertical phases of horse and rider using Hilbert Transform. To quantify coordination between horse and rider, mean and SD calculated for the relative phase between a reference marker located on the horse's sacrum and each marker on the rider. To determine whether the horse was influenced by the rider: periods between extensions (minima) and flexions (maxima) of vertical motion of horse'…	Mean relative phase across markers differed significantly between riders (F(1,4) = 8.23, p<0.05), indicating that the REC rider showed a larger phase lag relative to the horse's sacrum than the PRO. Interaction between rider skill and movement was significant (F(7, 98) = 52.95, p>0.01), with the shoulder, elbow and wrist aligned in the PRO rider, but a phase delay between these markers for the RE…	60
Lovett, T., Hodson-Tole, E. and Nankervis, K.	2005	A preliminary investigation of rider position during walk, trot and canter.	Biomechanics					Equine and Comparative Exercise Physiology	2, 71-76	Biomechanics	Female riders (n = 15) 19 – 21 years, 63.8 ± 6.38 kg, 169.4 ± 6.19 cm. All were BHS Stage III or equivalent Horse: (n = 1) TB Cross, 163 cm, competing in elementary dressage.	Experimental Arena Set Up	Cross Sectional	2D video data (25 Hz) collected from riders during walk, rising trot and canter. Markers placed on riders right ankle, knee, hip and shoulder.	Trunk, thigh and lowerr leg segment angles, measured in relaation to horizontal (determined as a line drawn from the top of the arena kick boards). Angles measured for each hoof impact event during one stride for each gait.	At walk: trunk ROM = 5.9° and trunk angle was significantly greater (posterior tilt) during HL hoof impacts than FL hoof impacts. Lower leg and thigh ROM were 2.9 and 1.9° respectively and no sig diffs occurred during gait events. At rising trot: trunk and lower leg segment ROM were 4.1° and 5.2° respectively. All segments were significantly closer to the vertical during left diagonal pair contac…	78.5714
Meyers, M. C. and Sterling, J. C.	2000	Physical, hematological, and exercise response of collegiate female equestrian athletes	Physiology					Journal of Sports Medicine & Physical Fitness	40, 131-138	Physiology	Female riders (n =24) age 23.6 ± 1.8 years, height 161.8 ± 5.0 cm, weight 64.9 ± 9.3 kg. Mean number of years of equestrian training / experience 8 ± 1.5 years. All participants were members of intercollegiate equestrian team with competitive experience.	Laboratory Exercise Test	Cross Sectional	Laboratory measurements taken in postabsorptive state to assess anthropometric status, body composition (hydrostatic weighing technique), aerobic power (graded exercise test to fatigue on a treadmill), anaerobic power and capacity (Wingate anaerobic power test, cycle ergometer), upper and lower body strength (Robertson modified curl-up test, reverse sit ups or back extensions and push-ups. Hand-h…	Anthropometric: Height (cm). Body mass (kg), Body fat (%), Lean body mass (kg), BMI (wt/ht2). Aerobic power: Heart Rate (bpm), Timemax (min:sec), VO2max (ml kg-1 min-1), METmax, RERmax, Expiratory ventilation - VEmax (1/min), Peak mean arterial pressure- MAPmax (mmHg), Forced vital capacity – FVC (1BTPS), Maximal voluntary ventilation – MVV (1/min), Residual volume – RV (1BTPS). Anaerobic Power a…	VO2max values similar to rodeo competitors, but lower than most summer and winter sports athletes. Equestrians were found to possess average aerobic capacity, suggesting that riding is not suitable for enhancing cardiorespiratory fitness. No indications of substantial anaerobic power in equestrians, with observed peak power, total work output, fatigue index and handgrip strength lower than publis…	85.7143
Meyers, M.C.	2006	Effect of equitation training on health and physical fitness of college females.	Physiology					European Journal of Applied Physiology	98, 177-184	Physiology	Study group: Female riders (n =15) with 8.0 ± 1.5 years equestrian experience. They had not participated in any equestrian training during the preceding 4 months leading up to the study. Control group: (n = 10) randomly recruited controls. In both groups: age 23.6 ± 2.5 years, height 165.3 ± 5.3 cm, weight 62.4 ± 3.4 kg. All subjects were students and lead a normally active lifestyle, but didn’t …	Laboratory Exercise Test	Before and After	Laboratory measurements taken pre and post-intervention to assess anthropometric status, body composition (hydrostatic weighing technique), aerobic power (graded exercise test to fatigue on a treadmill), anaerobic power and capacity (Wingate anaerobic power test, cycle ergometer), upper and lower body strength (Robertson modified curl-up test, reverse sit ups or back extensions and push-ups. Hand…	Anthropometric: Height (cm). Body mass (kg), Body fat (%), Fat-free mass (kg). Aerobic power: Peak Heart Rate (bpm), VO2max (ml kg-1 min-1), RERmax, Expiratory ventilation - VEmax (1/min), Peak mean arterial pressure- MAPmax (mmHg), Rate Pressure product (RPPpeak). Anaerobic Power and Muscular Strength: Peak power (PP) (W kg-1), Mean Power (MP) (W kg-1), Total work output (TWO) (J kg-1), fatigue …	No significant responses in cardiorespiratory function was observed for both groups over the 14-week study period, indicating minimal fitness improvement. A significant main effect of training across muscular power (p = 0.013) was observed for the equitation group. Pre-post improvements in mean muscular power (p = 0.01), total work output (p = 0.015) and fatigue index ( p = 0.038) were observed i…	100
Münz, A., Eckardt, F. and Witte, K.	2014	Horse-rider interaction in dressage riding	Biomechanics					Human Movement Science	33, 227-237	Biomechanics	Professional (PRO) riders (n = 10): 8 males, 2 females. Age 23.4 ± 5.3 years, height: 168.4 ± 10.4 cm, weight: 61.1 ± 9.6 kg, BMI 21.5 ± 2.5 kg/m2, Experience: 17.3 ± 5.6 years, Practice: 33.9 ± 11.9 hours/ week, Right/ Left handed 10/0. Beginner (BEG) riders (n = 10): 9 females, 1 male. Age 16.4 ± 2.9 years, Height 171.3 ± 5.2 cm, weight 59.3 ± 7.3 kg, BMI 20.2 ± 2.3 kg/m2, Experience 6.1 ± 1.7 …	Experimental Arena Set Up	Cross Sectional	IMU (XSens) (100 Hz), accelerometer (100 Hz), and videography (30 Hz) data synchronously recorded from riders and horses during straight line walk, sitting trot and right lead canter. IMUs placed on riders pelvis and on horse’s girth beneath the sternum. Accelerometer placed on FL MCIII to identify gait events. PRO riders rode their own horses (170 ± 3.5 cm in height) and BEG riders rode riding s…	IMU data for rider pelvis and horse sternum: Anterior posterior (AP): rotation about the mediolateral axis. Lateral (LT): rotation about the sagittal axis of the pelvis and cranio-caudal axis of the horse’s trunk. ROM, MAX and MIN variables obtained from time series of angles. Time lag between maximum cross correlation (pelvic vs. trunk) used to calculate phase shift between group averages.	For Walk: Pelvis AP of PRO riders was tilted significantly more forward (P<0.05) and their horses showed significantly higher MAX values (P<0.05) than BEG. No significant differences between PRO and BEG riders for LT. No phase shift between groups and the rider pelvis and horse trunk were found to move in phase. For Trot: BEG showed significantly lower values for AP MAX and MIN (P<0.05), but ROM …	73.3333
Münz, A., Eckardt, F., Heipertz-Hengst, C., Peham, C. and Witte, K.	2013	A preliminary study of an inertial sensor-based method for the assessment of human pelvis kinematics in dressage riding.	Biomechanics							Biomechanics	Non-professional dressage riders (n = 2). Both female, 39 and 46 years old, 172 and 178 cm, 80.9 and 67.4 kg, respectively. Both had over 30 years riding experience and rode 3 – 6 horse per week at the time of the study. Horse (n = 1): gelding, height 170 cm. In regular training at the time of the study.	Experimental Arena Set Up	Cross Sectional	IMU (XSens) (100 Hz), accelerometer (100 Hz), and videography data synchronously recorded from riders and horses during straight line walk, sitting trot, rising trot, and left lead canter. IMUs placed on riders pelvis and on horse’s girth beneath the sternum. Accelerometer placed on FL MCIII to identify gait events.	IMU data for rider pelvis and horse sternum: Anterior posterior (AP): rotation about the mediolateral axis. Lateral (LT): rotation about the sagittal axis of the pelvis and cranio-caudal axis of the horse’s trunk. ROM calculated obtained from time series of pelvis AP and LT angles over 1 stride. Coefficient of multiple correlation (CMC) calculated between angle-time courses of pelvis and sternum …	Highest AP ROM observed during canter, with AP ROM in sitting trot being approx. half and rising trot and walk being approx. one quarter of the AP ROM observed in canter. Differences between gaits for LT angles were less prominent than AP ROM. In rising trot, the AP angles of rider pelvis and horse sternum tended to run in-phase, while in sitting trot, canter and walk, they ran out-of-phase. Sign…	78.5714
Olivier, A., Faugloire, E., Lejeune, L., Biau, S. and Isableu, B.	2017	Head Stability and Head-Trunk Coordination in Horseback Riders: The Contribution of Visual Information According to Expertise						Frontiers in Human Neuroscience	11, 11, 1-16	Biomechanics	Professional riders (n = 12): 2 women, 10 men, age 38.33 ± 7.05 years, height 179.58 ± 8.47 cm, weight 70.75 ± 8.62 kg, riding experience: 29.67 ± 5.48 years, riding per week: 36.17 ± 6.56 hours. Club riders (n = 13): 7 women, 6 men, age 29.85 ± 6.07 years, height 171.23 ± 10.43 cm, weight 64.54 ± 9.65 kg, riding experience: 10.23 ± 6.02 years, riding per week: 1.31 ± 1.75 hours.	Experimental Riding Simulator	Cross Sectional	Club and professional horseback riders rode a riding simulator while facing a dynamic virtual scene under four visual conditions (normal lighting, stroboscopic illumination, normal lighting without virtual scene, no visual cues). Participants rode at simulated gallop (stride frequency of 1.4 Hz, vertical displacement 17 cm) and projection screen showed a computer-generated ride in a showjumping a…	Visual Field Dependence: Field Dependent (FD), Field Independent (FI). Variability of displacement for each segment: (head, C7, L3): Anterior posterior (SDAP), Mediolateral (SDML), Vertival (SDv). Coordination modes (AP axis only) for mean relative phases: Lumbar and cervical segment (ϕL – C), Lumbar and head segment (ϕL – H), Cervical and head segment (ϕC – H) Standard deviations of mean relativ…	Professional riders exhibited greater postural stability across all segments in the AP direction and greater head stability in the V direction than Club Riders (significantly lower SDAP and SDV (P<0.05) for Professional riders). Suggesting that riding expertise can be characterized by minimizing postural displacement in the AP axis and the head in the V axis. Apart from significantly greater Club…	86.6667
Pantall, A., Barton, S. and Collins, P.	2009	Surface electromyography of abdominal and spinal muscles in adult horseriders during rising trot	Biomechanics					In: Harrison, A. J., Anderson, R. & Kenny, I., eds. ISBS 27 International Symposium on Biomechanics in Sports, August 17 – 21, 2009 2009 Limerick, Ireland.		Biomechanics	Riders (n = 10): age: 36.5 ± 12.7 years, height: 1.7 ± 0.1 m. weight: 66.7 ± 9.9 kg. Riders of mixed ability from novice riders to Grand Prix level Horse (n = 10): height 1.6 ± 0.1 m	Experimental Arena Set Up	Cross Sectional	Surface electromyography (sEMG) (1000Hz) data collected from rider's left and right rectus abdominus and iliocostalis lumborium muscles during straight line medium walk and rising trot. Twin Axis Goniometer (20 Hz) placed over the middle of the sacrum and L5 to measure movement of the rider's lumbar spine.	Lumbosacral angle (sagittal plane) Mean amplitude of sEMG data from left and right rectus abdominus and illeocostalis lumborum Visual examination of sEMG activity and lumbosacral time-angle curve.	Experienced riders used their RA as an agonist (most active during LS flexion) to the dominant movement of trunk flexion, which was displayed as a phase-shifted pattern between RA and IL. This indicates more efficient control of muscle activation than in novice and older riders in the study (and one who had undergone spine surgery), who displayed coactivation of RA and IL to produce trunk flexion…	50
Peham, C., Licka, T., Kapaun, M. and Scheidl, M.	2001	A new method to quantify harmony of the horse–rider system in dressage	Biomechanics							Biomechanics	Professional rider (PRO) (n = 1): male, 33 years old, 65 kg. Recreational rider (REC) (n = 1): female, 30 years old, 65 kg Horses (n = 20): 4 – 22 years old, 2 mares, 3 stallions, 15 geldings, 18 WB, 2 TB. All of varying training levels	Experimental Arena Set Up	Cross Sectional	3D kinematic data (120 Hz) collected from horses ridden in working sitting trot and trotted in-hand in straight line. Data from all horse-rider combinations (n = 40) and in hand (n = 20) trials collected. PRO and REC rode each horse. Markers on the right fore hoof, frontal bone of horse and (in ridden conditions) head (right temporal region) and back (median line of the back in the lumbar area) o…	Dressage judged score. Length of vectors (LV) Average deviation of LV	Average dressage scores significantly (P<0.001) higher for the PRO rider (7.3 ± 2.7) than the REC rider (4.1±3.0). Trotting speed of REC (3.18 ± 0.2 m/s) was significantly lower than PRO (3.43 ± 0.19 m/s) (P<0.01) and unridden conditions (3.35 ± 0.27 m/s) (P<0.05). Average deviation of LV was sig lower for PRO (11.5 ± 1.4%) than REC (13 ± 2.8%) (P<0.05), indicating that the PRO was closer to stea…	73.3333
Peham, C., Licka, T., Schobesberger, H. and Meschan, E.	2004	Influence of the rider on the variability of the equine gait.	Biomechanics					Human Movement Science	23, 663-671	Biomechanics	Professional rider (n =1): male, age 33 years, body mass 75 kg. Horses (n = 21): aged 4 – 22 years old. Breed: 18 WB, 2 TB, 1 Arabian; Sex: 3 mares, 3 stallions, 13 geldings. All of varying training levels.	Experimental Treadmill Set Up	Cross Sectional	3D kinematic data (120 Hz) collected from horses trotting on a treadmill under three conditions: unridden, ridden with a fitting saddle, ridden with non-fitting saddle. Markers taped to L4 and the right fore hoof of the horse. Standard deviation (SD), velocity and acceleration of L4 marker calculated for each direction (x,y,z) at 100 time samples per stride. Max and min value calculated for dimen…	Variability of L4 marker motion, acceleration and velocity in horizontal, transversal and vertical direction.	Influence of rider: Variability of velocity (P<0.05) and acceleration (P<0.01) of forward direction were significantly lower in the ridden horse than the unridden horse. This finding illustrates the beneficial effect of the professional rider on the horses motion pattern variability. No other significant differences observed in relation to rider.	64.2857
Peinen, K.V., Wiestner, T., Bogisch, S., Roepstorff, L., Weeren, P.V. and Weishaupt, M.A.	2009	Relationship between the forces acting on the horse's back and the movements of rider and horse while walking on a treadmill.	Biomechanics					Equine Veterinary Journal	41, 285-291	Biomechanics	Experienced riders (n = 7): weight 78 ± 17 kg Horses (n = 7): WB, height 1.70 ± 0.07 m, weight 609 ± 62 kg. Training level: Intermediate (n = 1) and Grand Prix (n = 6) dressage.	Experimental Treadmill Set Up	Cross Sectional	3D kinematic (140 or 240 Hz), force (420 or 480 Hz) and saddle pressure (60 or 70 Hz) data synchronously collected from horses and riders in walk on an instrumented treadmill. Markers placed over: Horse: wing of atlas (left side), T6, L3, S3, mid-point of scapulae, left and right tuber coxae, lateral left front and hind hoof wall over coffin joint. Rider: sacrum and over left and right hip joint.…	Saddle force (FS), FS of entire pressure mat (FStot), FS of the left half of mat (FSL), FS of the right half of mat (FSR) Discrete values determined from all stride normalized FS curves of each horse: Stride mean (mean weight distribution on the sectors), Magnitude of local maxima (P1, P2, P3) and minima (M1, M2, M3) (expressed as deviation from respective stride mean), Time of the respective max…	Mean ± sd saddle force of the entire stride was: 31 ± 7% rider weight (rwt) in the frontal thirds of the saddle (FSLf + FSRr). 38 ± 3% rwt in the central thirds (FSLc + FSRc), 31.6 ± 6% rwt in the hind thirds (FSLh + FSRh).The difference between the saddle forces of the centre and front thirds were significantly different (P<0.05). The closest contact of the rider to the saddle (z distance rider …	50
Roberts, M., Shearman, J. and Marlin, D.	2009	A comparison of the metabolic cost of the three phases of the one-day event in female collegiate riders	Physiology					Comparative Exercise Physiology	6, 129-135	Physiology	Female riders (n = 16): age 24.5 ± 7.7, height 166.6 ± 3.8 cm, weight 60.3 ± 5.8 kg, BMI 21.7 ± 1.9, Body fat (%) 23.4 ± 5.3, lean body mass (kg) 48.5 ± 3.6 kg. All of mixed ability (10.6 ± 3.7 years riding), but capable of riding a Pre-Novice one-day event.	Experimental Competition Set Up	Cross Sectional	Data collected from riders during simulated one-day event (Pre-Novice) riding a familiar horse. Anthropometric data collected prior to event. Gas analysis and heart rate measured continuously throughout event phases. Blood lactate taken at rest and 1 min after each phase of event. Urine testing collected immediately before and after the event. Strength tested using hand held dynamometer immediate…	Oxygen uptake (average calculated for every 10 s), CO2 output, Respiratory exchange ratio (RER), Mean VO2, Mean energy expenditure, Maximal Heart Rate (HR), relative workload (%HRmax), Blood lactate concentration ([LA]b),Total osmolality of urine, Grip strength. Weight (before and after event)	Dressage phase results: Mean and peak VO2 were significantly lower for dressage in comparison to SJ and XC (P<0.001). Dressage values were 60 ± 12% for VO2max, 20.4 ± 4.0 Mean O2 uptake, 28.6 ± 6.2 Peak O2 uptake. Mean and peak HR were significantly lower for dressage in comparison to SJ and XC (P<0.001). Dressage values were 157 ± 15 bpm for mean HR and 172 ± 15 bpm for peak HR. The dressage pha…	85.7143
Sainas, G., Melis, S., Corona, F., Loi, A., Ghiani, G., Milia, R., Tocco, F., Marongiu, E. and Crisafulli, A.	2016	Cardio-metabolic responses during horse riding at three different speeds	Physiology					European Journal of Applied Physiology	116, 1985-92	Physiology	Riders (n = 19): 9 male, 10 female, age 30.4 ±13.2 years, height 166.7±8.1cm, Body Mass 59.3±11.7kg. Rode for 10 – 12 h per week and involved in regular riding programmes for at least 5 years.	Experimental Arena Set Up and Laboratory Exercise Test	Cross Sectional	Preliminary laboratory testing undertaken using incremental exercise test on cycle-ergometer to assess anaerobic threshold (AT) and VO2MAX. Riding session conducted at least 3 days (range 3 – 10) after preliminary lab testing. Riding consisted of 3 min sitting on a chair to collect basline data, Walking (5 min), trotting (10 min) and cantering (5 min) on right circle. During both preliminary and …	Anaerobic Threshold (AT),Oxygen Uptake (absolute) (VO2) (mL/min), Oxygen uptake (by body mass) (VO2/kg) (mL/kg/min), Carbon Dioxide Production (VCO2) (ml/ min), Respiratory Exchange Ratio (RER), Pulmonary ventilation (VE) (L/min), Heart rate (HR) (bpm), Oxygen pulse (OP) (mL/ bpm), Carbon dioxide excess (CO2excess) (mL/min), Workload (W) (watts)	Aerobic energy sources were only moderately recruited during riding, as VO2, VCO2, VE and OP were below the AT (assessed during the preliminary lab test), except HR, which approached the AT level during canter only (mean 158 bpm at canter vs. 159.23 ± 18.51 during lab test). VO2, VCO2 , VE, HR and OP progressively increased (throughout the riding session) and showed significant increases between …	92.8571
Schils, S.J., Greer, N.L., Stoner, L.J. and Kobluk, C.N.	1993	Kinematic analysis of the equestrian—walk, posting trot and sitting trot	Biomechanics					Human Movement Science	12, 693-712	Biomechanics	Riders (n = 63): 53 females, 10 males. Mean age = 26 (range 17 – 58), body mass 65 kg (range 41 – 104 kg), height 168 cm (range 147 – 196 cm). Participants divided into Advanced (n = 21), Novice (n = 21) and Beginner (n = 21) groups based on the decisions of three licensed dressage judges. Horse (n = 1): TB mare, 16.1 hands. Well-trained in dressage.	Experimental Arena set Up	Cross Sectional	High speed videography (200 Hz) data collected during straight line walk, posting trot and sitting trot trials in sagittal plane. Gait order randomized. Markers rider's left side over: lateral malleolus, lateral side of condyles of femur, greater trochanter, glenohumeral joint center and on the rider’s upper arm to serve as reference point for shoulder angle determination. Marker placed on horse’…	Relative and absolute sagittal plane angles (°) for rider's: Hip joint, Knee joint, Shoulder joint, Trunk segment, Thigh segment, Lower leg segment, Upper Arm segment.	Relative knee angle was the only variable to show no significant main effect (P>0.05) on ability, which may indicate that knee angle isn’t an indicator of rider ability level. At sitting trot significant differences were found for trunk angle between beginner and advanced (P<0.05) and intermediate and advanced riders (P<0.05). The difference between intermediate and advanced suggests that trunk a…	73.3333
Schöllhorn, W.I., Peham, C., Licka, T. and Scheidl, M.	2006	A pattern recognition approach for the quantification of horse and rider interactions.	Biomechanics					Equine Veterinary Journal	38, 400-405	Biomechanics	Professional rider (n = 1): male, age 33 years, weight 65 kg. Recreational rider (n = 1): female,age 30 years, weight 65 kg. Horses (n = 14): varying training levels.	Experimental Arena set Up	Cross Sectional	3D kinematic data (120 Hz) collected from horses ridden in sitting trot and trotted in-hand in straight line. Data collected from all horse-rider combinations (n = 28) and in hand (n = 14) trials. Variable time courses normalized to 100% duration of motion and mapped on trajectories of an N = 11 x 11 Kohonen map. Distances between all trajectories formed a distance landscape thats structure was a…	2D angles, angular velocities and angular accelerations for: Hind fetlock joint angle, Front fetlock joint angle, Head angle, Back angle, Hock angle.	Cluster analysis of head variables revealed a classification by the rider, which could be attributed to the effect of reins on head and neck position. The PRO rider was able to control head-related variables of 13 horses (difference between ridden and the unridden conditions), but the REC rider could only control this in 3 horses (i.e. in the other 11 horses, horse-movement was dominant). Classif…	66.6667
Sung, B. J., Jeon, S. Y., Lim, S. R., Lee, K. E. and Jee, H.	2015	Equestrian expertise affecting physical fitness, body compositions, lactate, heart rate and calorie consumption of elite horse riding players	Physiology					Journal of Exercise Rehabilitation	11, 175-81	Physiology	Participants poorly described: Amateur and elite male riders (n = 6 -7) recruited for each of the 3 experiments (i.e. different experimental group used per experiment). Riding experience ranged from 1 - 23 years and age variance was 20 - 37 years. Mean ± SD age, height and weight metrics included in tabular from in article, but not possible to calculate overall metrics from these data.	Laboratory Exercise Test and Experimental Arena Set Up	Before and After	Three experiments performed for comparing physical fitness, body compositions, lactate, HR and caloric consumption change before and after horse riding in elite and amateur riders. The riding intervention consisted of 3 min rest, 2 min walk, 5 min fast, 3 min walk, jump and recovery (jumping data not included here). Methods for physical fitness measures largely undescribed. HR measured throughout…	Measures of physical fitness: Grip strength (kg), Back strength (kg), Push-up (beat/ min), Sit-up (beat/ min), Trunk forward flexion (Sit and reach) (cm), Side step (beat/ 20 sec), Standing on one leg with eyes closed (sec), VO2Max (ml/kg/min), 20m shuttle run (beat). Measures obtained during riding intervention: HR, calorie consumption.	No significant differences found between eltie and amateur riders across all physical fitness variables (P>0.05). Although it was non-significant, balance, examined by standing on one leg with eyes shut, was almost 2 times more in elite riders compared to amateur. Elites also had 21.5% more back strength and 14.6% and 6.4% more right and left grip strength, respectively than amateurs. The HR of e…	56.25
Symes, D. and Ellis, R.	2009	A preliminary study into rider asymmetry within equitation.	Biomechanics					The Veterinary Journal	181, 34-37	Biomechanics	Female riders (n = 17): Age range 16 – 50 years, body mass 64.25 ± 8.18 kg, height 168.47 ± 6.45 cm. Experience ranged from riding club to advanced dressage.	Experimental Arena Set Up	Cross Sectional	2D video data (sampling rate not described) collected from riders during walk, sitting trot and left and right canter on a straight line. Video data collected from sagittal and transverse planes. Markers placed on rider: superior aspect of each shoulder, one on acromioclavicular joint and one midway between first marker and the base of neck. Markers placed on horse: 3 markers placed at 12 cm inte…	Rider Axial Rotation (AR) (median shoulder angle (left and right)), Shoulder Angle Displacement (SAD) (median shoulder angle - 90°), Leg length inequality (LLI)	Walk showed no significant differences between left and right SAD (P>0.05). In trot, the right shoulder had significantly higher SAD (P<0.01) and a left AR. Shoulder displacement angles between left and right canter lead were significantly different (p<0.001). For left lead canter, the right shoulder had significantly higher SAD than the right shoulder (P<0.01) and a left AR. Left canter showed t…	35.7143
Terada, K., Clayton, H.M. and Kato, K.	2006	Stabilization of wrist position during horseback riding at trot	Biomechanics					Equine and Comparative Exercise Physiology	3, 179-184	Biomechanics	Riders (n = 6): height 1.64 ± 0.04 m, Body mass 61 ± 7 kg. Experienced in riding and training FEI-level dressage horses. Horse (n = 1): TB, age 16 years, height 1.56 m, mass: 508 kg. Competed in intermediate dressage competition.	Experimental Arena Set Up	Cross Sectional	Kinematic data (120 Hz) collected from rider and horse during straight line sitting trot trials. Markers placed on rider’s right lateral epicondyle of the humerus (elbow) and greater trochanter (hip) and horse's right greater tubercle of humerus, lower part of tuber coxae, and attachment of rein to bit. Marker clusters placed on dorsal surface of rider’s forearm and upper arm, to locate virtual m…	Maximal, minimal, mean, ROM and times of occurrence calculated for each variable: Vertical displacement (mm) of: horse’s shoulder and pelvis. Rider's hip, shoulder, elbow, wrist. Linear Distance between (mm): bit to rider’s hip, bit to rider’s shoulder, bit to rider’s wrist. Anglular Variables (°): trunk segment (measured relative to vertical), shoulder joint, elbow joint, forearm segment (measur…	Experienced riders adopt an almost vertical trunk orientation, with an average angle of 4° and maintained a consistent distance from wrist to bit by adjusting the angles of their shoulder and elbow joints in relation to the movements of their trunk and hips, which moved in relation to the horse. Movements of the riders shoulder (mean -6°) and elbow (mean 132°) were extended as the trunk tilted ba…	64.2857
Terada, K.	2000	Comparison of head movement and EMG activity of muscles between advanced and novice horseback riders at different gaits.	Biomechanics					Journal of Equine Science	11, 83-90	Biomechanics	Novice riders (n = 3): weight 53 ± 1.5 kg, ≤ 1 year riding experience. Advanced riders (n = 3): weight 51 ± 2.6 kg, compete in Japan’s student competitions	Experimental Arena Set Up	Cross Sectional	Accelerometer (1000 Hz), sEMG (1000 Hz) and videography data collected from riders during walk, sitting trot and canter on a straight line. sEMG sensors attached over rectus abdominis (RA), erector spinae (ES), adductor magnus (AM). Accelerometer used to measure head movement and attached to vertex part of the helmet. Video data used to visually determine gait events. Frequency analysis of accele…	Stride frequency (Hz) Mean “dispersion values” (of acceleration frequency band) for proximal-distal and cranio-caudal head movement. Mean EMG frequency gradations/ bands (low, intermediate, high)	For walk: novice riders showed a significantly higher dispersion value than advanced riders for proximal-distal head movement (P<0.01), suggesting unstable head movement. Advanced riders showed more activity in higher frequency bands across all muscles compared to novice riders. For sitting trot: novice riders showed a significantly higher dispersion value than advanced riders (P<0.05) for crania…	53.3333
Terada, K., Mullineaux, D.R., Lanovaz, J., Kato, K. and Clayton, H.M.	2004	Electromyographic analysis of the rider's muscles at trot.	Biomechanics					Equine and Comparative Exercise Physiology	1, 193-198	Biomechanics	Riders (n = 6): female, height 1.64 ± 0.04m, weight 61 ± 7kg. All experienced riders, Horse (n = 1): TB, age 16 years, height 1.56 m, weight 508 kg. Trained for dressage.	Experimental Arena Set Up	Cross Sectional	sEMG (1200 Hz) and videography (60 Hz)data collected from riders during trot on a straight line. sEMG data collected from: Rectus abdominus (RA), Upper trapezius (UT), Middle trapexius (MT), Lower trapezius (LT), Serratus anterior (SA), Teres major (TM), Flexor carpi radialis (FR), Extensor carpi ulnaris (EU), Biceps brachili (BB), Triceps brachili (TB), Middle deltoid (MD), Pectoralis major (PM)…	Mean muscle activity for each phase Mean 0ccurrence of Peak EMG in each phase Both variables measured across 10 phases of stride: • Flight 1: early, late • Flight 2: early, late • Stance 1: early, middle, late • Stance 2: early, middle, late	Consistent pattern and peak timings observed for RA, UP, MT, FCR, BB, MD muscles across riders, suggesting that muscular activity is synchronized with the horse’s movements to stabilize the rider’s position. At beginning of stance: UT, MT, MD, FCR were active to stablise the rider’s neck, scapula and wrist during impact. FCR and BB contracted in early stance and alternated with TB, which contract…	50
Westerling, D.	1983	A study of physical demands in riding	Physiology					European Journal of Applied Physiology and Occupational Physiology	50, 373-382	Physiology	Experienced riders (“study group”) (n = 13): female. Mean age 21 (16 – 28), height 1.71 m (1.60 – 1.80), weight 61.5 kg (49 – 74). Rode 3 – 14 hours per week. Elite riders (n = 3): 2 females, 1 male. Mean: age 30 (26 - 36), height 1.71 m (1.58 – 1.81), weight 66.8 kg (55 – 73.5). Rode 16 – 30 hours per week. Control group (n = 7): female non-riders. Mean: age 29 (27 - 33), height 1.68 m (1.61 – 1…	Experimental Arena Set Up and Laboratory Exercise Test	Cross Sectional	Laboratory exercise testing: Bicycle ergometer test at submaximal and maximal intensities. Isokinetic and hand held dynamometer to measure muscle strength. Conducted by all groups. Riding test at walk, trot and canter (5 min at each gait). Conducted by "study group" and elite riders. HR recorded and expelled air collected in Douglas bag throughout test.	Laboratory testing: Bicycle ergometer: HR, Oxygen uptake (VO2), pulmonary ventilation (VE), respiratory quotient (RQ). Muscle strength: Maximal voluntary contraction (MVC) (Nm) for knee extension, hip adduction, elbow flexion, trunk flexion/extension. Hand grip (N). Endurance (30% MVC min) for hand grip, elbow flexion, knee extension. Riding Test: VO2, HR, VE, RQ.	The aerobic demands of the riding test were relatively high and corresponded to oxygen uptake at a workload of 120 Watt on the bicycle ergometer test. The study group used between 60 and 90% of their maximal aerobic power during canter, but the elite group used only 38, 39 and 58%. During riding, the female elite riders had superior maximal aerobic capacity compared with the study group. At subma…	46.6667
Wolframm, I.A., Bosga, J. and Meulenbroek, R.G.	2013	Coordination dynamics in horse-rider dyads.	Biomechanics					Human Movement Science	32, 157-170	Biomechanics	Riders (n = 18): female age 37.57 ± 13.04. Split into two groups according to the Dutch National Equestrian Federation: Advanced (n = 3): competing at “ZZ licht” – advanced national to Grand Prix Intermediate (n = 12): competing at “M”– medium and “Z” – advanced-medium level Novice (n = 3): competing at the lowest two levels (“B” – beginner, “L” – easy) Horses (n=18): 5 mares, 13 geldings, age 8.…	Experimental Arena Set Up	Cross Sectional	Accelerometer data (128 Hz) collected from horse and rider during “warming-up” and “performance" protocols. Warming up = 20 m circle on left and right rein at walk, rising trot, sitting trot, canter. Riders rode as normal for 15 min and then did performance protocol, which was the same as warming up protocol. Accelerometers placed on rider’s sternum and on the horse's girth to align vertically to…	Kinematic variables: Horse-rider coordination, Mean relative phase, Mean SD relative phase, Approximate entropy rider, Approximate entropy horse, Spectral edge frequency (SEP 95)	Mann-Whitney U tests (applied to test the assumption that horse-rider coordination values differed significantly between canter and other gaits) showed that canter had significantly higher correlations compared to walk, rising trot and sitting trot (p<0.0001) and that entropy horse values were significantly lower for canter compared to walk (p<0.0001), rising trot (p<0.005) and sitting trot (p<0.…	64.2857
